# Supplementary material
Source: PubMed Central journal article supplement (PMC4282556)

**Figure 3C**

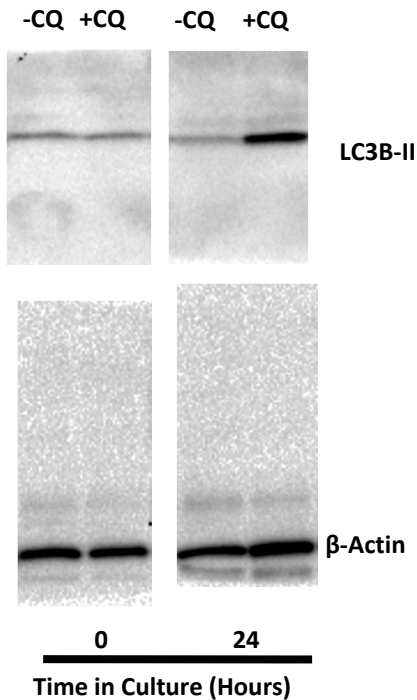

Supplement: embj0033-2782-sd4.pdf [file embj0033-2782-sd4.pdf]
